# Supplementary material
Source: PubMed Central journal article supplement (PMC9171655)
Supplement: jamapediatr-e221630-s001.pdf [file jamapediatr-e221630-s001.pdf]

## Supplementary Online Content

Zhao J, Yu Z, Sun X, et al. Association between screen time trajectory and early childhood development in children in China. *JAMA Pediatr*. Published online June 6, 2022. doi:10.1001/jamapediatrics.2022.1630

**eMethods.** Trajectory Analysis

**eTable 1.** Participant Characteristics of Sample Included in the Analysis

**eTable 2.** Statistical Parameters for 2-, 3-, and 4-Group-Based Trajectory Models

**eTable 3.** Cognitive and Psychosocial Development of Children at 72 Months by Screen Time Trajectory Group

**eTable 4.** Comparison of Demographic Characters Between Current Study and SCHEDULE-P Study

**eTable 5.** Eligibility Criteria of Sample in Birth Cohort

**eFigure 1.** Flowchart of the Study Participants

**eFigure 2.** Group-Based Trajectory Models for 2-, 3-, and 4-Group Adherence Trajectory Solution

**eFigure 3.** Screen Time Trajectories of Individuals in the Continued Low Group

**eFigure 4.** Screen Time Trajectories of Individuals in the Late Increasing Group

**eFigure 5.** Screen Time Trajectories of Individuals in the Early Increasing Group

This supplementary material has been provided by the authors to give readers additional information about their work.

## **eMethods. Trajectory Analysis**

### **The strategy of model selection**

Several goodness-of-fit and model adequacy indices were used to compare different models and to select the best one. The criteria were:

1. The smallest group had to include at least 7% of the sample.
2. Bayesian Information Criterion (BIC): the value closest to 0 indicates the best-fitting model.
3. The average posterior probability (AvePP) for each group had to be more than 0.7.
4. The odds of correct classification (OCC) for each group had to be more than 5.0.

#### ***First step: selection of the number of trajectories***

As the choice of the order of the trajectory for each group is less important than the choice of the number of such groups, the order of the polynomial is determined by a highest order (quartic). The BIC values, group proportions, APP, and OCC for the 2-, 3-, and 4-group-based trajectory models were used to determine the best model. A 5-group model was tested but failed to converge. Statistical parameters for 2-, 3-, and 4-group-based trajectory models all met the criteria of group proportion, APP, and OCC (eTable 3). The BIC value continued to increase as more groups were added. In such an instance, more subjective criteria based on domain knowledge should be used to select the number of groups. Groups 2 and 3 in the 4-group-based trajectory model have a pattern similar to that of Group 3 in the 3-group-based trajectory model (eTable 2). As it is recommended to select a model with no more groups than are necessary to communicate the distinct features of the data, a 3-group-based trajectory model was selected as the final model. The screen time trajectories of individuals in three groups were presented in eFigures 3, 4, and 5.

#### ***Second step: Selection of the polynomial terms of each group***

Once the number of groups is identified, we then reduce the polynomial orders until the highest order polynomial for each group is significant at the confidence level  $\alpha (a) = 0.01$ . The final model had a cubic order for the first group (slow increasing), a linear order for the second group (rapid increasing), and a quartic order for the third group (early increasing).

**eTable 1.** Participant Characteristics of Sample Included in the Analysis

| Characteristics                               | All ( <i>n</i> = 262) | Included in Analysis ( <i>n</i> = 152) | <i>p</i> -value |
|-----------------------------------------------|-----------------------|----------------------------------------|-----------------|
| Sex, <i>n</i> (%)                             |                       |                                        |                 |
| Male                                          | 132 (50.4)            | 75 (49.3)                              | 0.84            |
| Female                                        | 130 (49.6)            | 77 (50.7)                              |                 |
| Mother's educational attainment, <i>n</i> (%) |                       |                                        |                 |
| High school and below                         | 23 (8.8)              | 12 (7.9)                               | 0.94            |
| College or bachelor's degree                  | 196 (74.8)            | 114 (75.0)                             |                 |
| Master's degree or above                      | 43 (16.4)             | 26 (17.1)                              |                 |
| Family income, <i>n</i> (%)                   |                       |                                        |                 |
| 139k RMB and below                            | 102 (38.9)            | 54 (35.5)                              | 0.79            |
| 140-199k RMB/year                             | 72 (27.5)             | 44 (29.0)                              |                 |
| 200k RMB and above                            | 88 (33.6)             | 54 (35.5)                              |                 |

**eTable 2.** Statistical Parameters for 2-, 3-, and 4-Group-Based Trajectory Models

| Parameter                                                                                | Number of groups    |                     |                     |
|------------------------------------------------------------------------------------------|---------------------|---------------------|---------------------|
|                                                                                          | 2                   | 3                   | 4                   |
| BIC ( $N = 152$ )                                                                        | -4945.97            | -4927.78            | -4920.09            |
| BIC ( $N = 1,045$ )                                                                      | -4957.54            | -4945.13            | -4943.22            |
| $N$ (observed group proportion, %)/ (group proportion based on posterior probability, %) |                     |                     |                     |
| Group 1                                                                                  | 120 (78.9) / (78.6) | 111 (73.0) / (72.2) | 104 (68.4) / (68.3) |
| Group 2                                                                                  | 32 (21.1) / (21.4)  | 17 (11.2) / (12.9)  | 11 (9.9) / (10.2)   |
| Group 3                                                                                  |                     | 24 (15.8) / (15.0)  | 18 (10.5) / (10.2)  |
| Group 4                                                                                  |                     |                     | 13 (11.2) / (11.4)  |
| AvePP / OCC                                                                              |                     |                     |                     |
| Group 1                                                                                  | 0.97 / 9.2          | 0.97 / 11.0         | 0.97 / 9.4          |
| Group 2                                                                                  | 0.91 / 37.5         | 0.92 / 94.9         | 0.86 / 45.2         |
| Group 3                                                                                  |                     | 0.89 / 45.0         | 0.93 / 57.0         |
| Group 4                                                                                  |                     |                     | 0.87 / 165.0        |

*Note:* The trajectory of each group was the quartic polynomial order.

BIC: Bayesian information criterion; AvePP: Average posterior probability; OCC: odds of correct classification.

**eTable 3.** Cognitive and Psychosocial Development of Children at 72 Months by Screen Time Trajectory Group

| Development score                | All<br>( <i>N</i> = 152) | Screen time trajectory group       |                                        |                                      | <i>p</i> -value |
|----------------------------------|--------------------------|------------------------------------|----------------------------------------|--------------------------------------|-----------------|
|                                  |                          | Continued low<br>( <i>n</i> = 110) | Late<br>increasing<br>( <i>n</i> = 17) | Early increasing<br>( <i>n</i> = 25) |                 |
| WISC-IV scores, mean (SD)        |                          |                                    |                                        |                                      |                 |
| Full-Scale Intelligence Quotient | 114.27 (12.33)           | 116.14 (12.26)                     | 108.35 (11.98)                         | 110.08 (10.94)                       | <0.01           |
| General Abilities Index          | 119.99 (14.73)           | 121.10 (15.33)                     | 113.88 (14.25)                         | 119.28 (11.43)                       | 0.17            |
| Verbal Comprehension             | 116.05 (12.02)           | 116.65 (12.56)                     | 112.06 (12.35)                         | 116.16 (8.87)                        | 0.34            |
| Perceptual Reasoning             | 117.92 (14.24)           | 119.45 (14.33)                     | 110.71 (13.73)                         | 116.12 (12.95)                       | <0.05           |
| Cognitive Proficiency Index      | 102.70 (13.33)           | 104.85 (13.14)                     | 99.47 (11.52)                          | 95.44 (12.72)                        | <0.01           |
| Working Memory                   | 103.11 (12.73)           | 105.53 (13.01)                     | 98.41 (8.49)                           | 95.68 (10.14)                        | <0.001          |
| Processing Speed                 | 101.64 (12.55)           | 103.09 (11.49)                     | 100.47 (13.05)                         | 96.04 (15.31)                        | <0.05           |
| SDQ scores, mean (SD)            |                          |                                    |                                        |                                      |                 |
| Total Difficulties               | 9.41 (4.51)              | 8.91 (4.48)                        | 10.71 (4.48)                           | 10.72 (4.39)                         | 0.09            |
| Emotional Symptoms               | 1.86 (1.63)              | 1.86 (1.61)                        | 1.88 (1.73)                            | 1.80 (1.73)                          | 0.98            |
| Conduct Problems                 | 1.47 (1.23)              | 1.38 (1.14)                        | 1.65 (1.17)                            | 1.72 (1.62)                          | 0.38            |
| Hyperactivity/<br>Inattention    | 3.97 (2.50)              | 3.59 (2.50)                        | 4.94 (2.59)                            | 4.96 (2.01)                          | <0.05           |
| Peer Relationship Problems       | 2.12 (1.48)              | 2.07 (1.58)                        | 2.24 (1.20)                            | 2.24 (1.20)                          | 0.83            |
| Prosocial behavior               | 7.39 (2.06)              | 7.25 (2.10)                        | 7.82 (2.16)                            | 7.68 (1.80)                          | 0.42            |

*Note:* WISC-IV: Wechsler Intelligence Scale for Children (Fourth Edition); SDQ: Strengths and Difficulties Questionnaire.

**eTable 4.** Comparison of Demographic Characters Between Current Study and SCHEDULE-P Study

|                                               | Current study            | SCHEDULE-P study           |                                           |
|-----------------------------------------------|--------------------------|----------------------------|-------------------------------------------|
|                                               | ( <i>n</i> = 262)        | Sample ( <i>n</i> = 20324) | Weighted proportion <sup>a</sup> (95% CI) |
| Birthday range                                | June 2012 to August 2013 | December 2011 to July 2014 | N/A                                       |
| Sex, <i>n</i> (%)                             |                          |                            |                                           |
| Male                                          | 132 (50.4)               | 10573 (52.1)               | 52.2 (51.3, 53.2)                         |
| Female                                        | 130 (49.6)               | 9751 (48.0)                | 47.8 (46.8, 48.7)                         |
| Mother's educational attainment, <i>n</i> (%) |                          |                            |                                           |
| High school and below                         | 23 (8.8)                 | 4269 (21.0)                | 26.1 (25.1, 27.0)                         |
| College or bachelor's degree                  | 196 (74.8)               | 13794 (67.9)               | 64.1 (63.1, 65.0)                         |
| Master's degree or above                      | 43 (16.4)                | 2198 (10.8)                | 9.5 (9.0, 10.0)                           |
| Unknown/refused                               | 0 (0.0)                  | 63 (0.3)                   | 0.4 (0.3, 0.5)                            |

*Note:* a. Sampling weights were computed using inverse probability weighting, using which the results represent 167,597 children enrolled kindergartens in 2016.

*Reference:* Wang X, Zhang Y, Zhao J, Shan W, Zhang Z, Wang G, Jiang Y, Zhu W, Zhang D, He Y, Mao H, Qu J, Zhu Q, Jiang F. Cohort Profile: The Shanghai Children's Health, Education and Lifestyle Evaluation, Preschool (SCHEDULE-P) study. *Int J Epidemiol.* 2021 May 17;50(2):391-399.

**eTable 5.** Eligibility Criteria of Sample in Birth Cohort

| Inclusion Criteria                                                                                                                                                                                                                                                                                                                                                                        | Exclusion Criteria                                                                                                                                                                                                                                                                                                                                                                                                                                                                                                                                                                                                                                                                                                                                                                                                                                                                                                                                                                                                                                                                                                                                                                                                                                                                                                                                                                                                                                                                                                                       |
|-------------------------------------------------------------------------------------------------------------------------------------------------------------------------------------------------------------------------------------------------------------------------------------------------------------------------------------------------------------------------------------------|------------------------------------------------------------------------------------------------------------------------------------------------------------------------------------------------------------------------------------------------------------------------------------------------------------------------------------------------------------------------------------------------------------------------------------------------------------------------------------------------------------------------------------------------------------------------------------------------------------------------------------------------------------------------------------------------------------------------------------------------------------------------------------------------------------------------------------------------------------------------------------------------------------------------------------------------------------------------------------------------------------------------------------------------------------------------------------------------------------------------------------------------------------------------------------------------------------------------------------------------------------------------------------------------------------------------------------------------------------------------------------------------------------------------------------------------------------------------------------------------------------------------------------------|
| <b>First stage of screening:</b>                                                                                                                                                                                                                                                                                                                                                          |                                                                                                                                                                                                                                                                                                                                                                                                                                                                                                                                                                                                                                                                                                                                                                                                                                                                                                                                                                                                                                                                                                                                                                                                                                                                                                                                                                                                                                                                                                                                          |
| Eligible pregnant women:                                                                                                                                                                                                                                                                                                                                                                  | Pregnant women were excluded if they were diagnosed with:                                                                                                                                                                                                                                                                                                                                                                                                                                                                                                                                                                                                                                                                                                                                                                                                                                                                                                                                                                                                                                                                                                                                                                                                                                                                                                                                                                                                                                                                                |
| <ol style="list-style-type: none"> <li>1. were age 18 to 45 years</li> <li>2. were of gestational age <math>\geq 28</math> weeks</li> <li>3. had ultrasonography that indicated singleton pregnancy without any known deformity</li> </ol>                                                                                                                                                | <ol style="list-style-type: none"> <li>1. preterm labor symptoms during pregnancy</li> <li>2. gestational hypertension (<math>\geq 20</math> weeks of gestation, two consecutive measurements, systolic blood pressure <math>\geq 140</math> mmHg and/or diastolic blood pressure <math>\geq 90</math> mmHg)</li> <li>3. gestational diabetes mellitus (75 g oral glucose tolerance test): fasting blood glucose level <math>\geq 5.1</math> mmol/L (92 mg/dl), 1-hour blood glucose level <math>\geq 10.0</math> mmol/L (180 mg/dl), or 2-hour blood glucose level <math>\geq 8.5</math> mmol/L (153 mg/dl)</li> <li>4. organic heart disease (rheumatic heart disease, congenital heart disease, coronary heart disease, dilated cardiomyopathy, hypertrophic cardiomyopathy, or heart failure (heart function III level or higher))</li> <li>5. severe lung disease (active pulmonary tuberculosis or pulmonale)</li> <li>6. liver diseases (active hepatitis or liver cirrhosis)</li> <li>7. chronic kidney disease (chronic nephritis, nephroma, or chronic renal insufficiency)</li> <li>8. severe blood disease (primary thrombocytopenia, aplastic anemia, hemophilia, or severe anemia (hemoglobin <math>&lt; 60</math> g/L))</li> <li>9. autoimmune diseases (rheumatoid arthritis, systemic lupus erythematosus, or scleroderma)</li> <li>10. thyroid dysfunction (primary hypothyroidism)</li> <li>11. acquired immune deficiency syndrome (AIDS), gonorrhea, or syphilis</li> <li>12. cancer or mental disorders</li> </ol> |
| <b>Second stage of screening:</b>                                                                                                                                                                                                                                                                                                                                                         |                                                                                                                                                                                                                                                                                                                                                                                                                                                                                                                                                                                                                                                                                                                                                                                                                                                                                                                                                                                                                                                                                                                                                                                                                                                                                                                                                                                                                                                                                                                                          |
| Eligible pregnant women:                                                                                                                                                                                                                                                                                                                                                                  |                                                                                                                                                                                                                                                                                                                                                                                                                                                                                                                                                                                                                                                                                                                                                                                                                                                                                                                                                                                                                                                                                                                                                                                                                                                                                                                                                                                                                                                                                                                                          |
| <ol style="list-style-type: none"> <li>1. were long-term residents in Shanghai and delivered in the eastern division of the Renji Hospital</li> <li>2. was willing to participate in the study along with follow-up visits at the specified time</li> <li>3. had no difficulty in language communication</li> <li>4. was not participating in other clinical research projects</li> </ol> |                                                                                                                                                                                                                                                                                                                                                                                                                                                                                                                                                                                                                                                                                                                                                                                                                                                                                                                                                                                                                                                                                                                                                                                                                                                                                                                                                                                                                                                                                                                                          |
| <b>Third stage of screening:</b>                                                                                                                                                                                                                                                                                                                                                          |                                                                                                                                                                                                                                                                                                                                                                                                                                                                                                                                                                                                                                                                                                                                                                                                                                                                                                                                                                                                                                                                                                                                                                                                                                                                                                                                                                                                                                                                                                                                          |
| Eligible neonates were:                                                                                                                                                                                                                                                                                                                                                                   | Neonates were excluded if they:                                                                                                                                                                                                                                                                                                                                                                                                                                                                                                                                                                                                                                                                                                                                                                                                                                                                                                                                                                                                                                                                                                                                                                                                                                                                                                                                                                                                                                                                                                          |
| born at term                                                                                                                                                                                                                                                                                                                                                                              | <ol style="list-style-type: none"> <li>1. were admitted to the neonatal intensive care unit after birth</li> <li>2. had Apgar score <math>\geq 7</math> at 1 or 5 minutes asphyxia at birth</li> </ol>                                                                                                                                                                                                                                                                                                                                                                                                                                                                                                                                                                                                                                                                                                                                                                                                                                                                                                                                                                                                                                                                                                                                                                                                                                                                                                                                   |

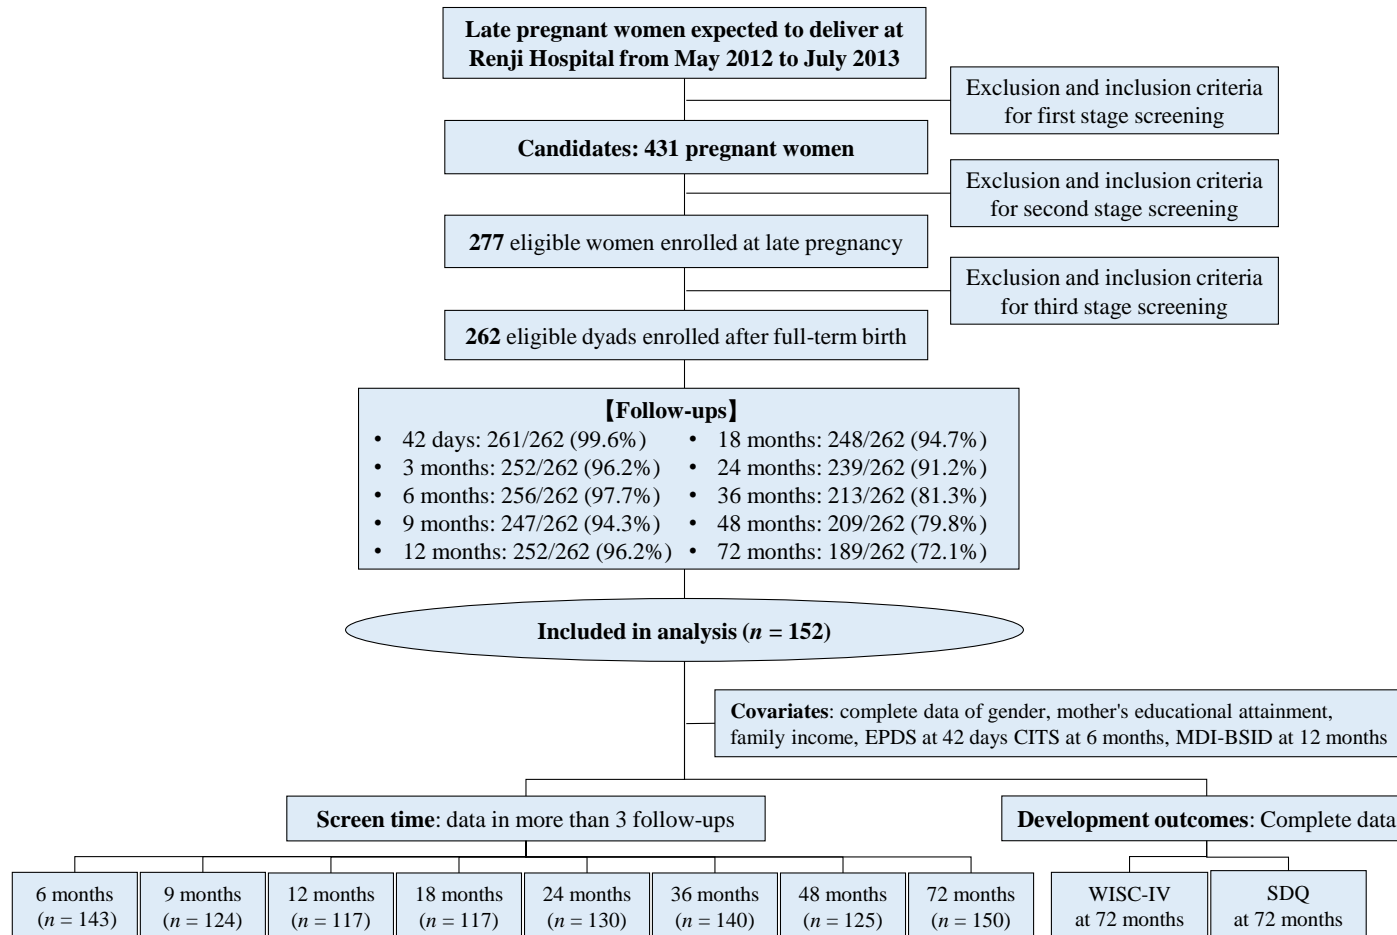

**eFigure 1.** Flowchart of the Study Participants

*Notes:* EPDS: Edinburgh Postnatal Depression Scale; BSID-MDI, Bayley Scales of Infant Development-Metal Scale Index; CITS, Chinese Infant Temperament Scale. WISC-IV, Wechsler Intelligence Scale for Children (Fourth Edition); SDQ, Strengths and Difficulties Questionnaire.



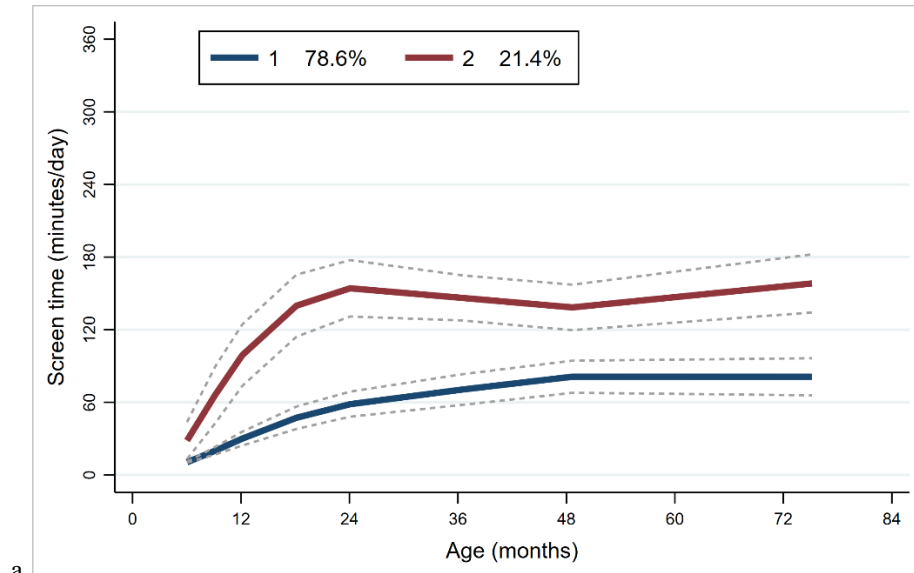

a.

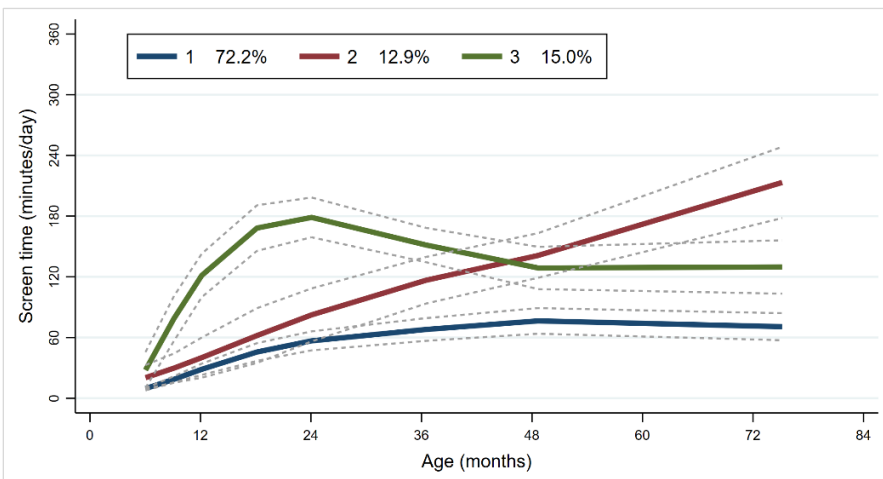

b.

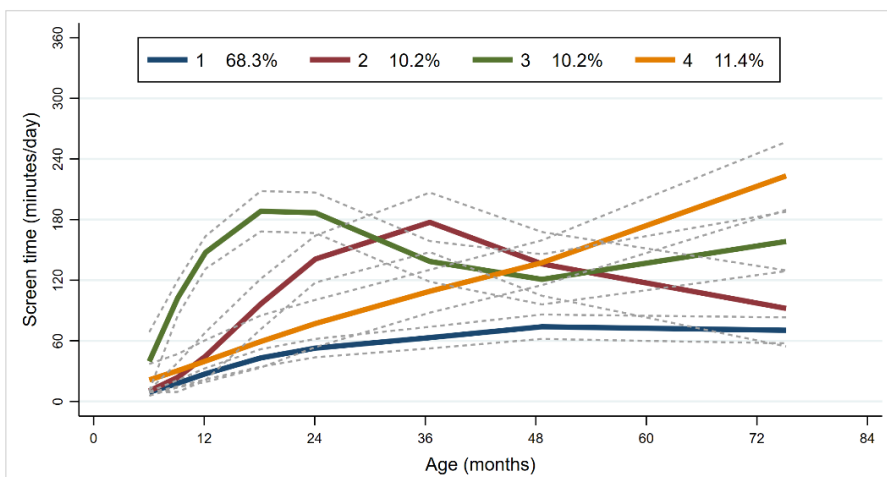

c.

**eFigure 2.** Group-Based Trajectory Models for 2-, 3-, and 4-Group Adherence Trajectory Solution

*Note:* The trajectory of each group was quartic polynomial order.

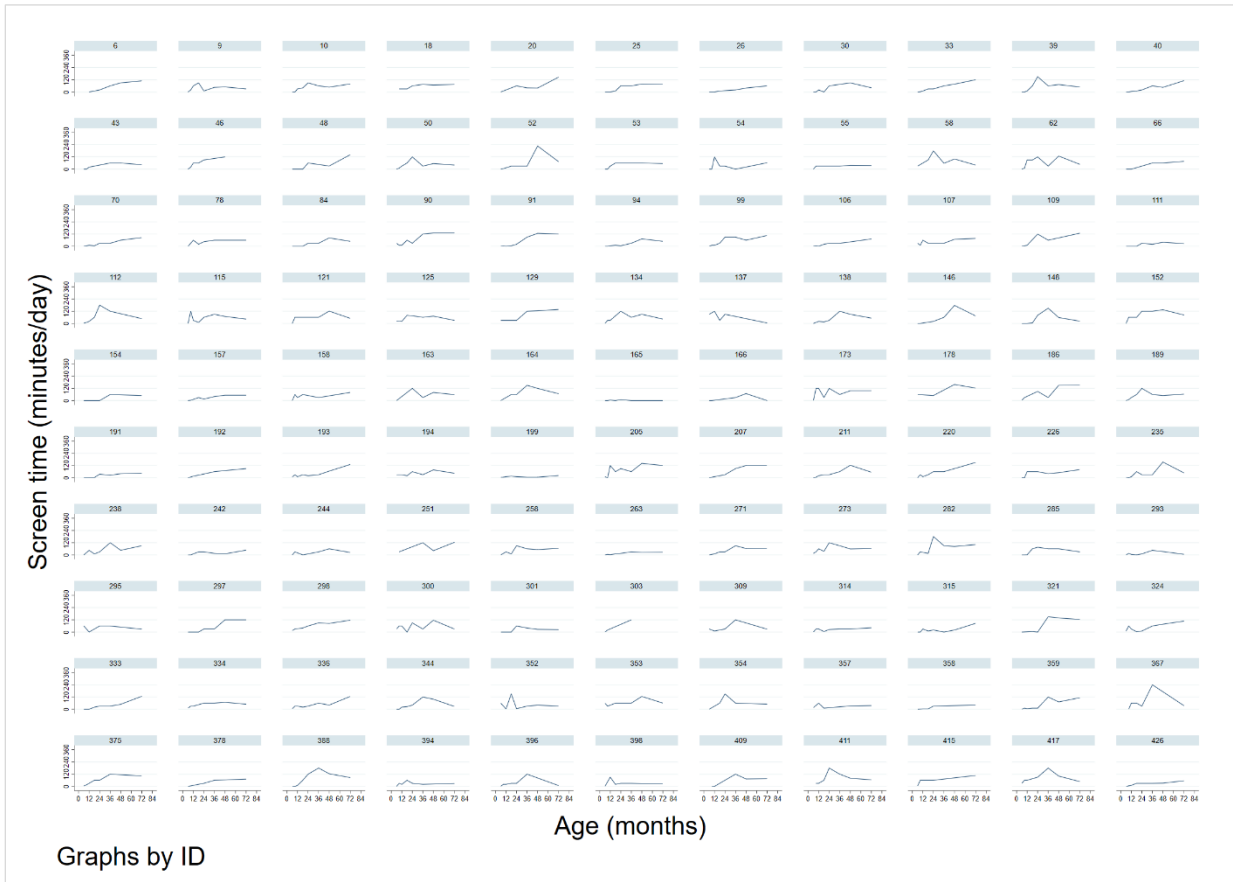

**eFigure 3.** Screen Time Trajectories of Individuals in the Continued Low Group

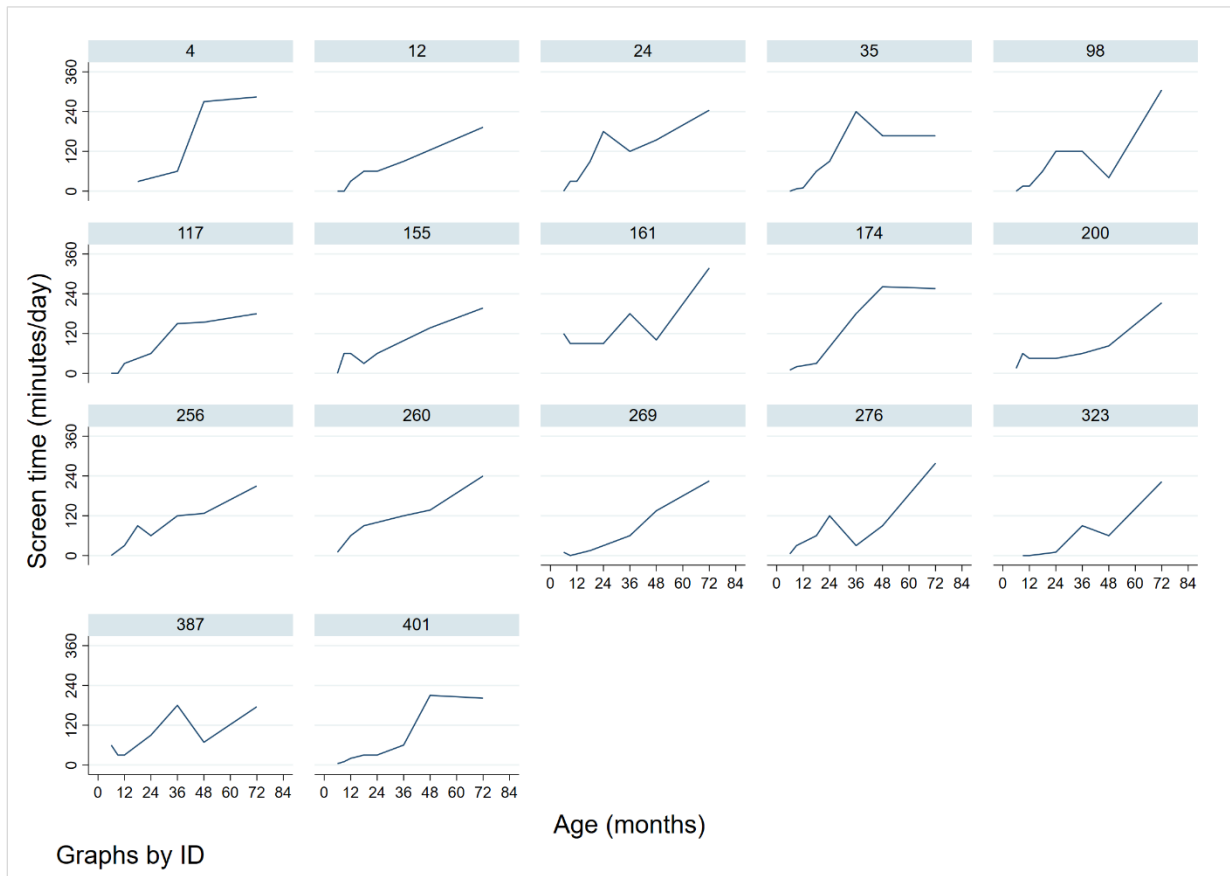

**eFigure 4.** Screen Time Trajectories of Individuals in the Late Increasing Group

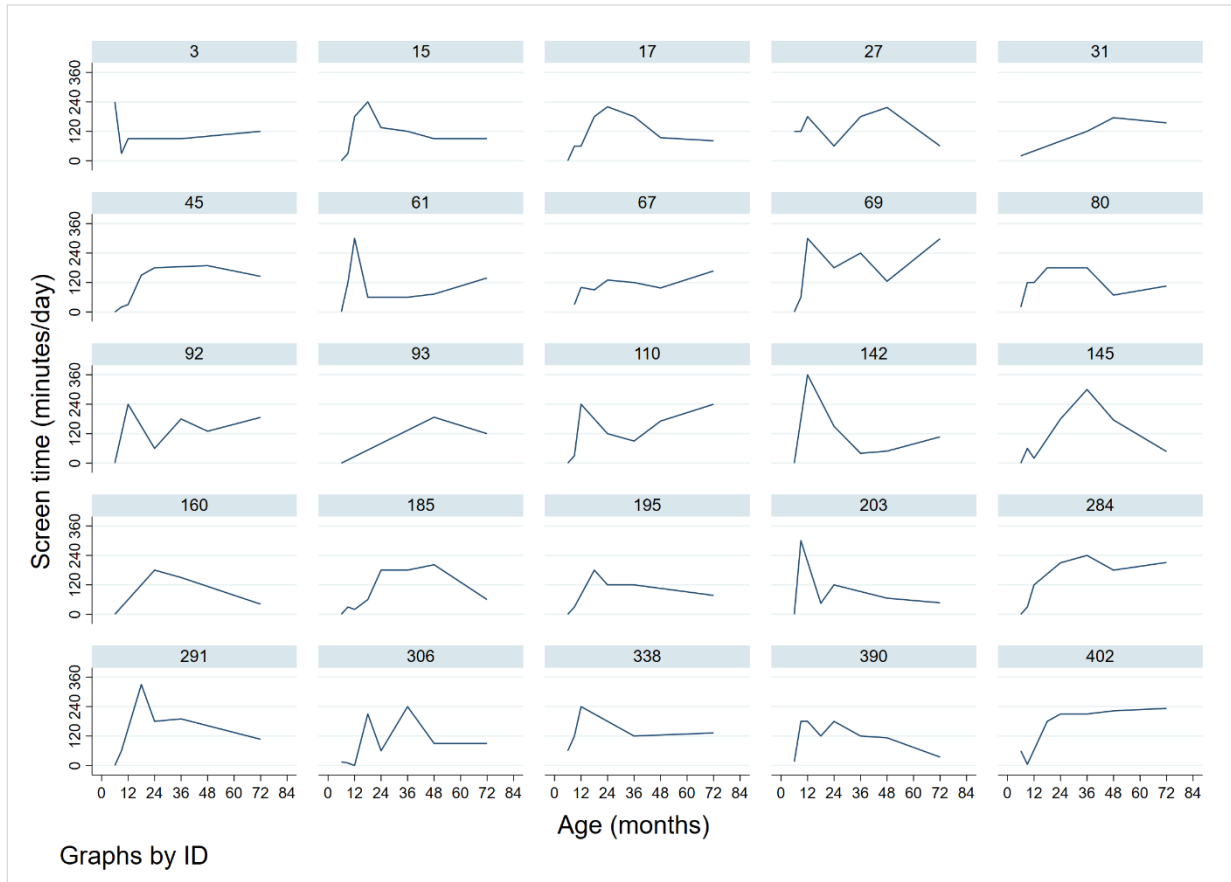

**eFigure 5.** Screen Time Trajectories of Individuals in the Early Increasing Group
